# Supplementary material
Source: PubMed Central journal article supplement (PMC6644553)
Supplement: ao8b00654_si_001.pdf [file ao8b00654_si_001.pdf]

## Supporting information

### **Bimetallic CoMoS composite anchored to bio-carbon fibers as a high-capacity anode for Li-ion batteries**

Noemi Dominguez<sup>a</sup>, Brenda Torres<sup>b,c</sup>, Luis A. Barrera<sup>c</sup>, Julio E. Rincon<sup>a</sup>, Yirong Lin<sup>d</sup>, Russell R. Chianelli<sup>b,c</sup>, Md. Ariful Ahsan<sup>c</sup>, Juan C. Noveron<sup>c\*</sup>

<sup>a</sup> Department of Metallurgical, Materials and Biomedical Engineering, The University of Texas at El Paso, TX 79968, United States

<sup>b</sup> Materials Research and Technology Institute, The University of Texas at El Paso, TX 79968, United States

<sup>c</sup> Department of Chemistry, The University of Texas at El Paso, TX 79968, United States

<sup>d</sup> Department of Mechanical Engineering, The University of Texas at El Paso, TX 79968, United States

\*Corresponding Author

E-mail address: jcnoveron@utep.edu

XRD (X-Ray Diffraction) measurements were performed on a D8 diffractometer from Bruker instruments (Cu K $\alpha$  radiation,  $\lambda = 0.154$  nm) with a scan rate of two degree/min. SEM (Scanning Electron Microscopy) and EDS (Energy Dispersive Spectroscopy) images were obtained by using a Hitachi S-4800 machine. TEM (Transmission Electron Microscopy) images were acquired by a Hitachi H-7650 equipment. Image J software was used to measure the sizes of the particles and carbonized cellulose fibers from SEM images. The software used for fitting the Nyquist plots was EIS Spectrum Analyzer.

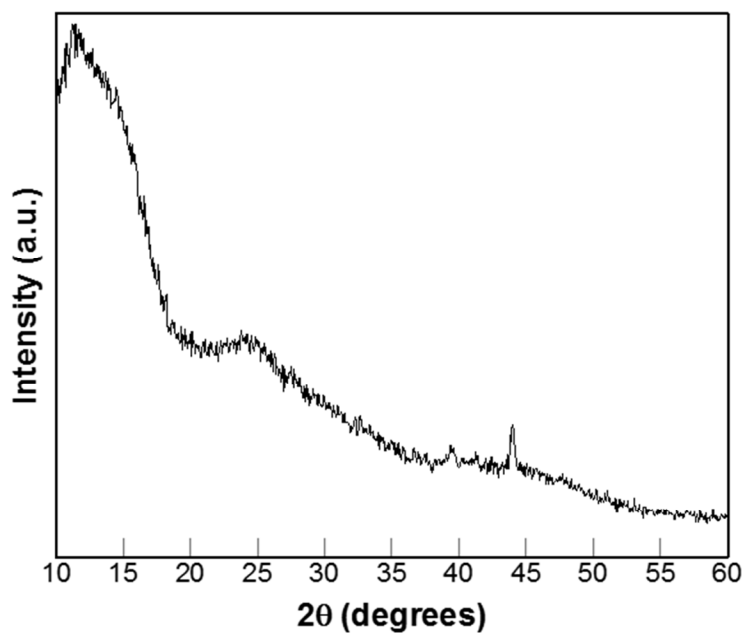

Figure. S1. XRD patterns of carbonized cellulose fibers.

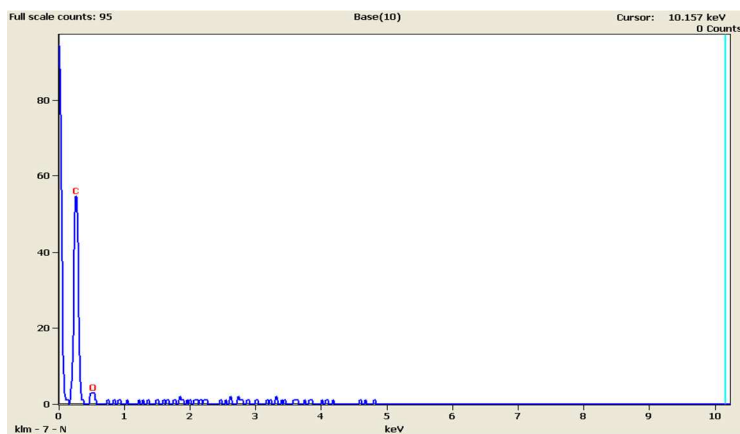

Figure. S2. EDS spectrum of carbonized cellulose fibers.

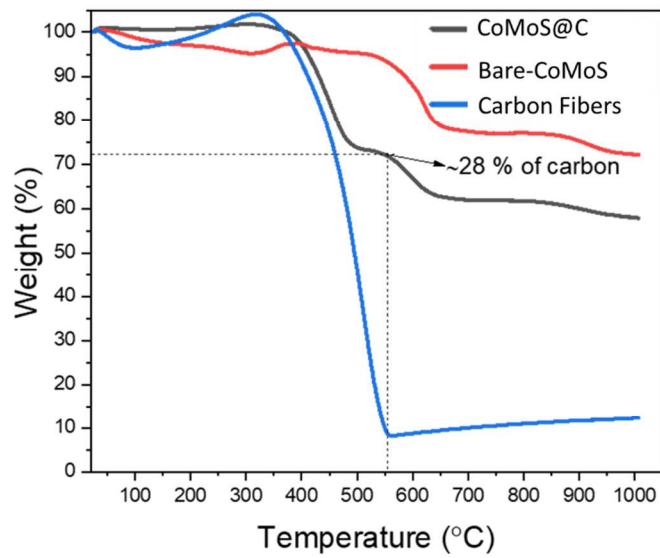

Figure. S3. TGA for samples CoMoS@C, bare-CoMoS and carbon fibers (cellulose fibers carbonized at 400 °C for 1h).

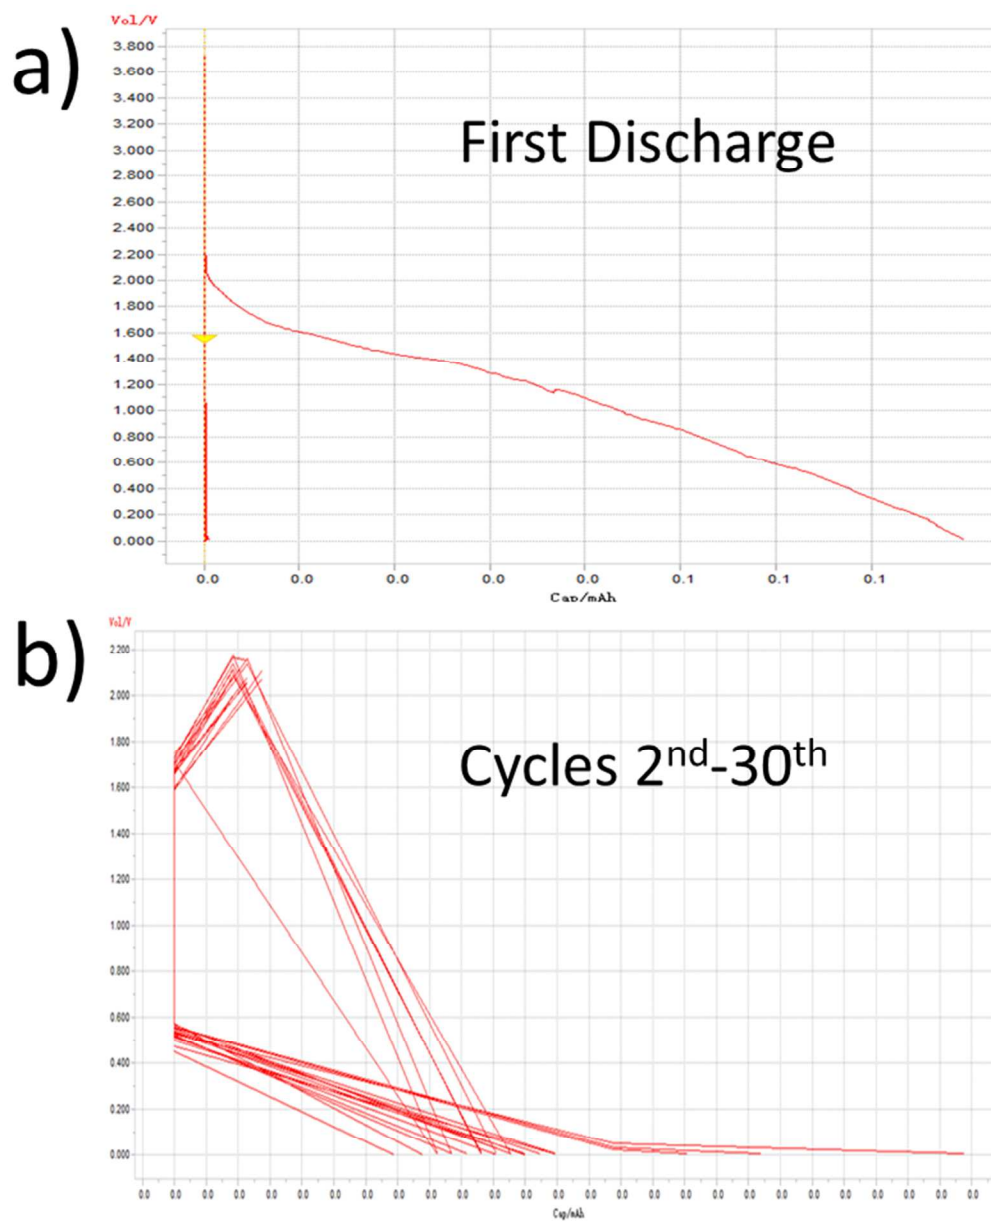

Figure. S4. Charging and discharging plots for carbonized cellulose fibers a) first discharge and b) cycles from 2<sup>nd</sup> to 30<sup>th</sup>.

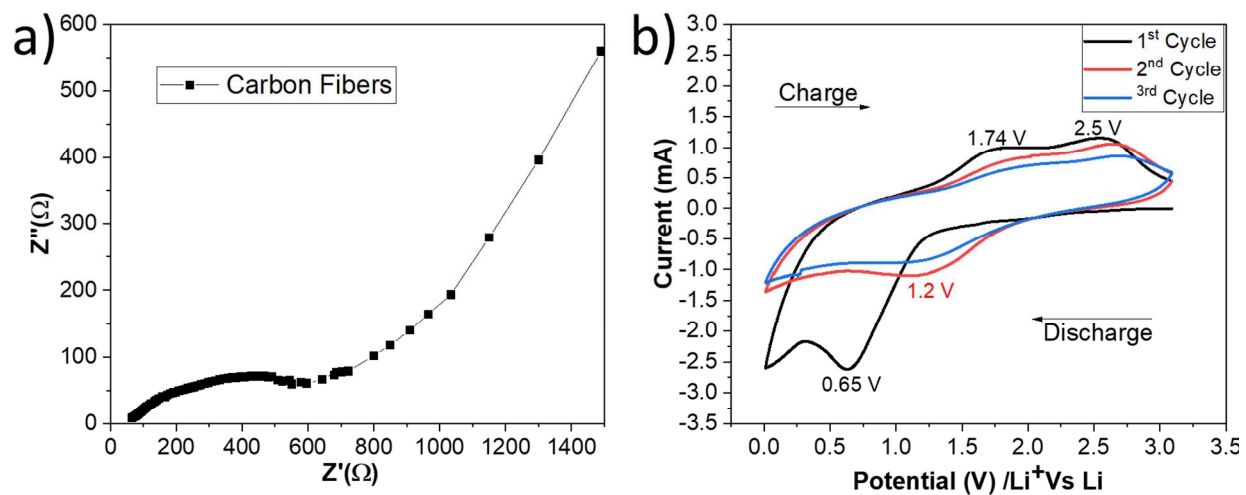

Figure. S5. a) Nyquist plots for carbon fibers and b) Cyclic voltammetry curves for bare-CoMoS.
